# Supplementary material
Source: PubMed Central journal article supplement (PMC3483816)

# Supplemental Figure 1

A

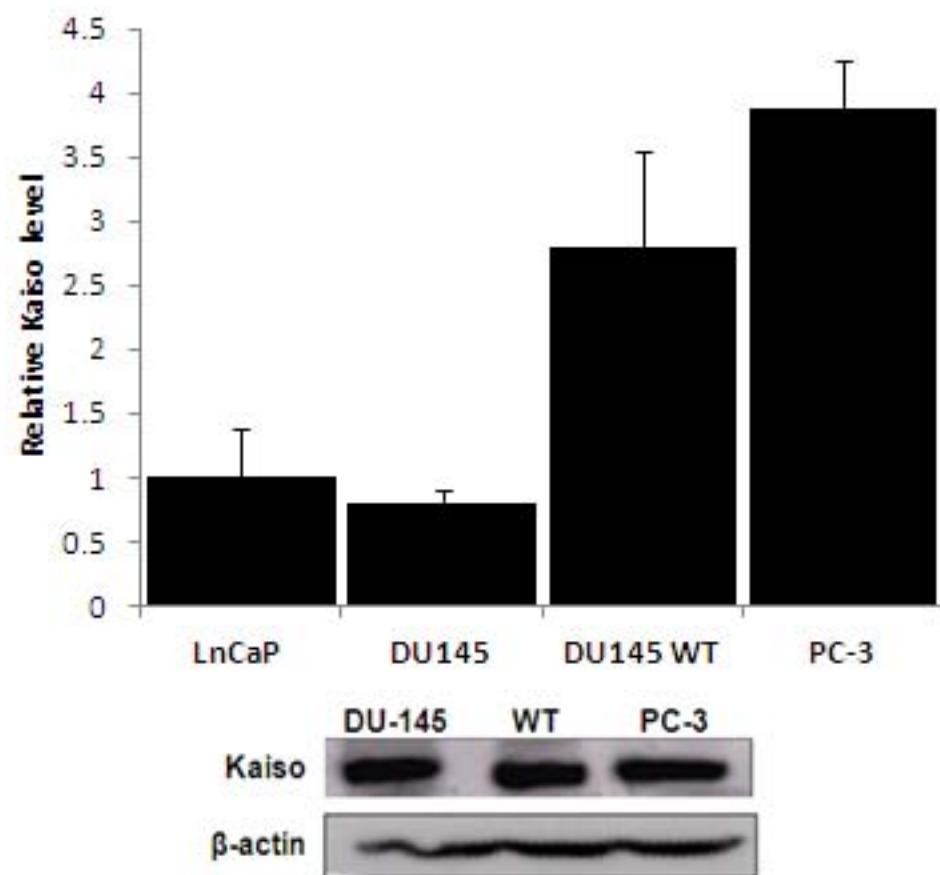

B

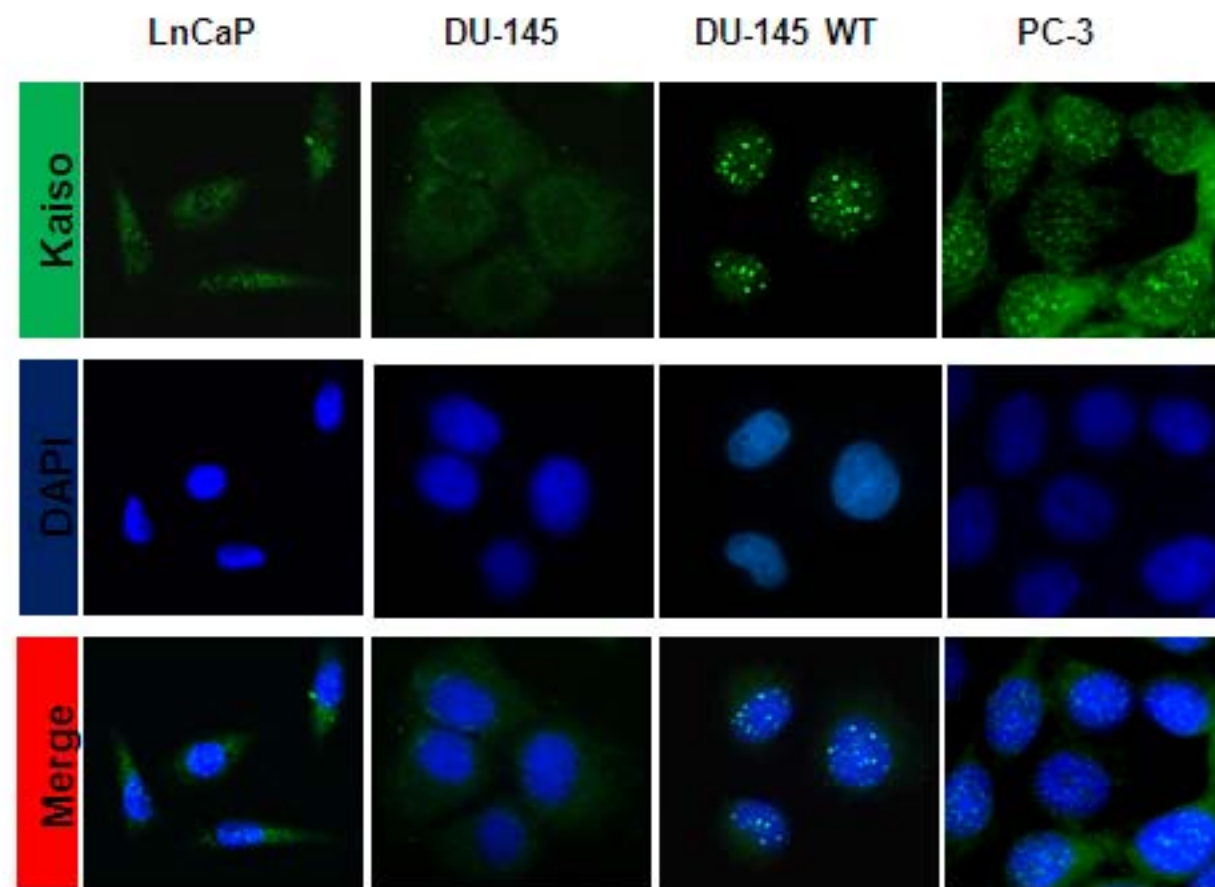

C

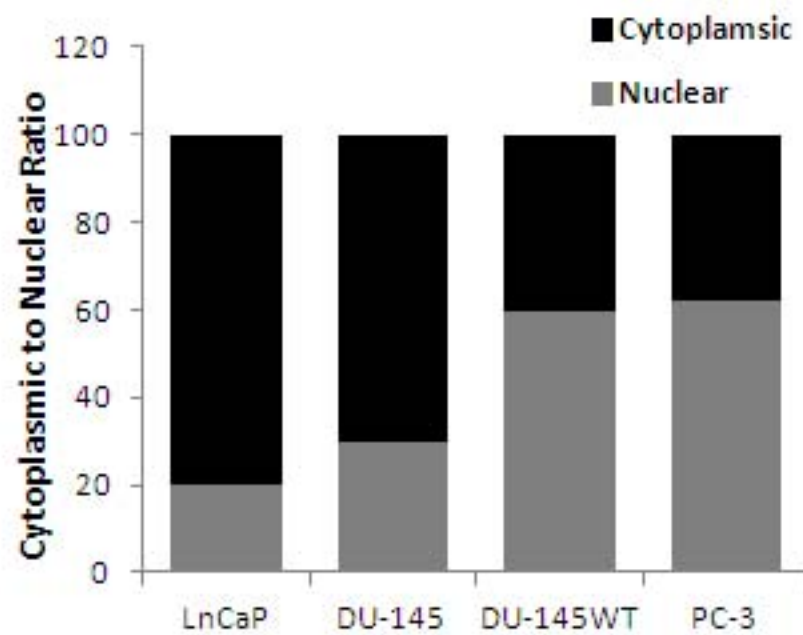

D

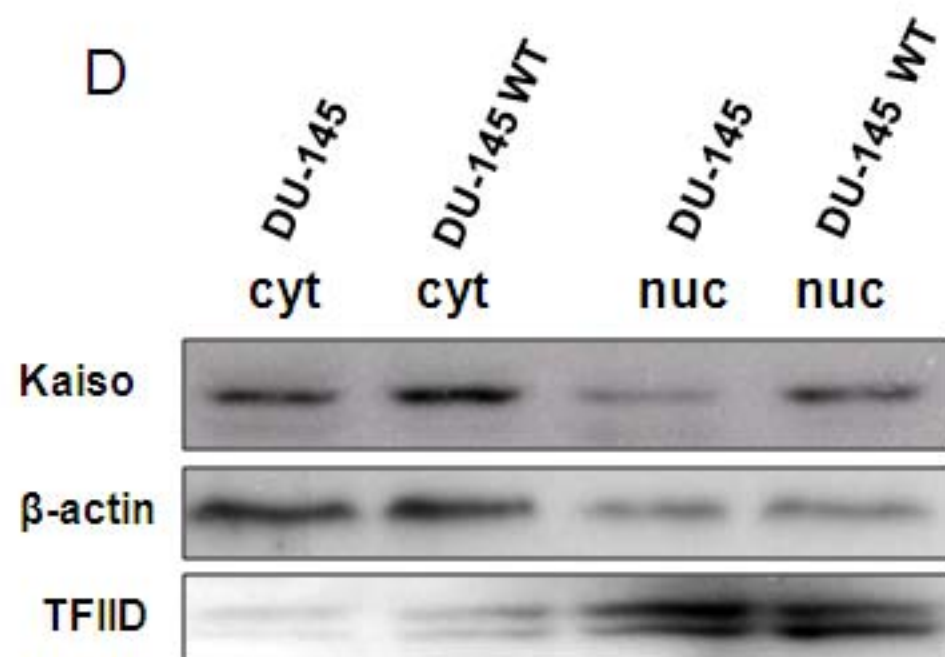

Supplement: mmc1.pdf [file mmc1.pdf]

# Supplemental Figure 2

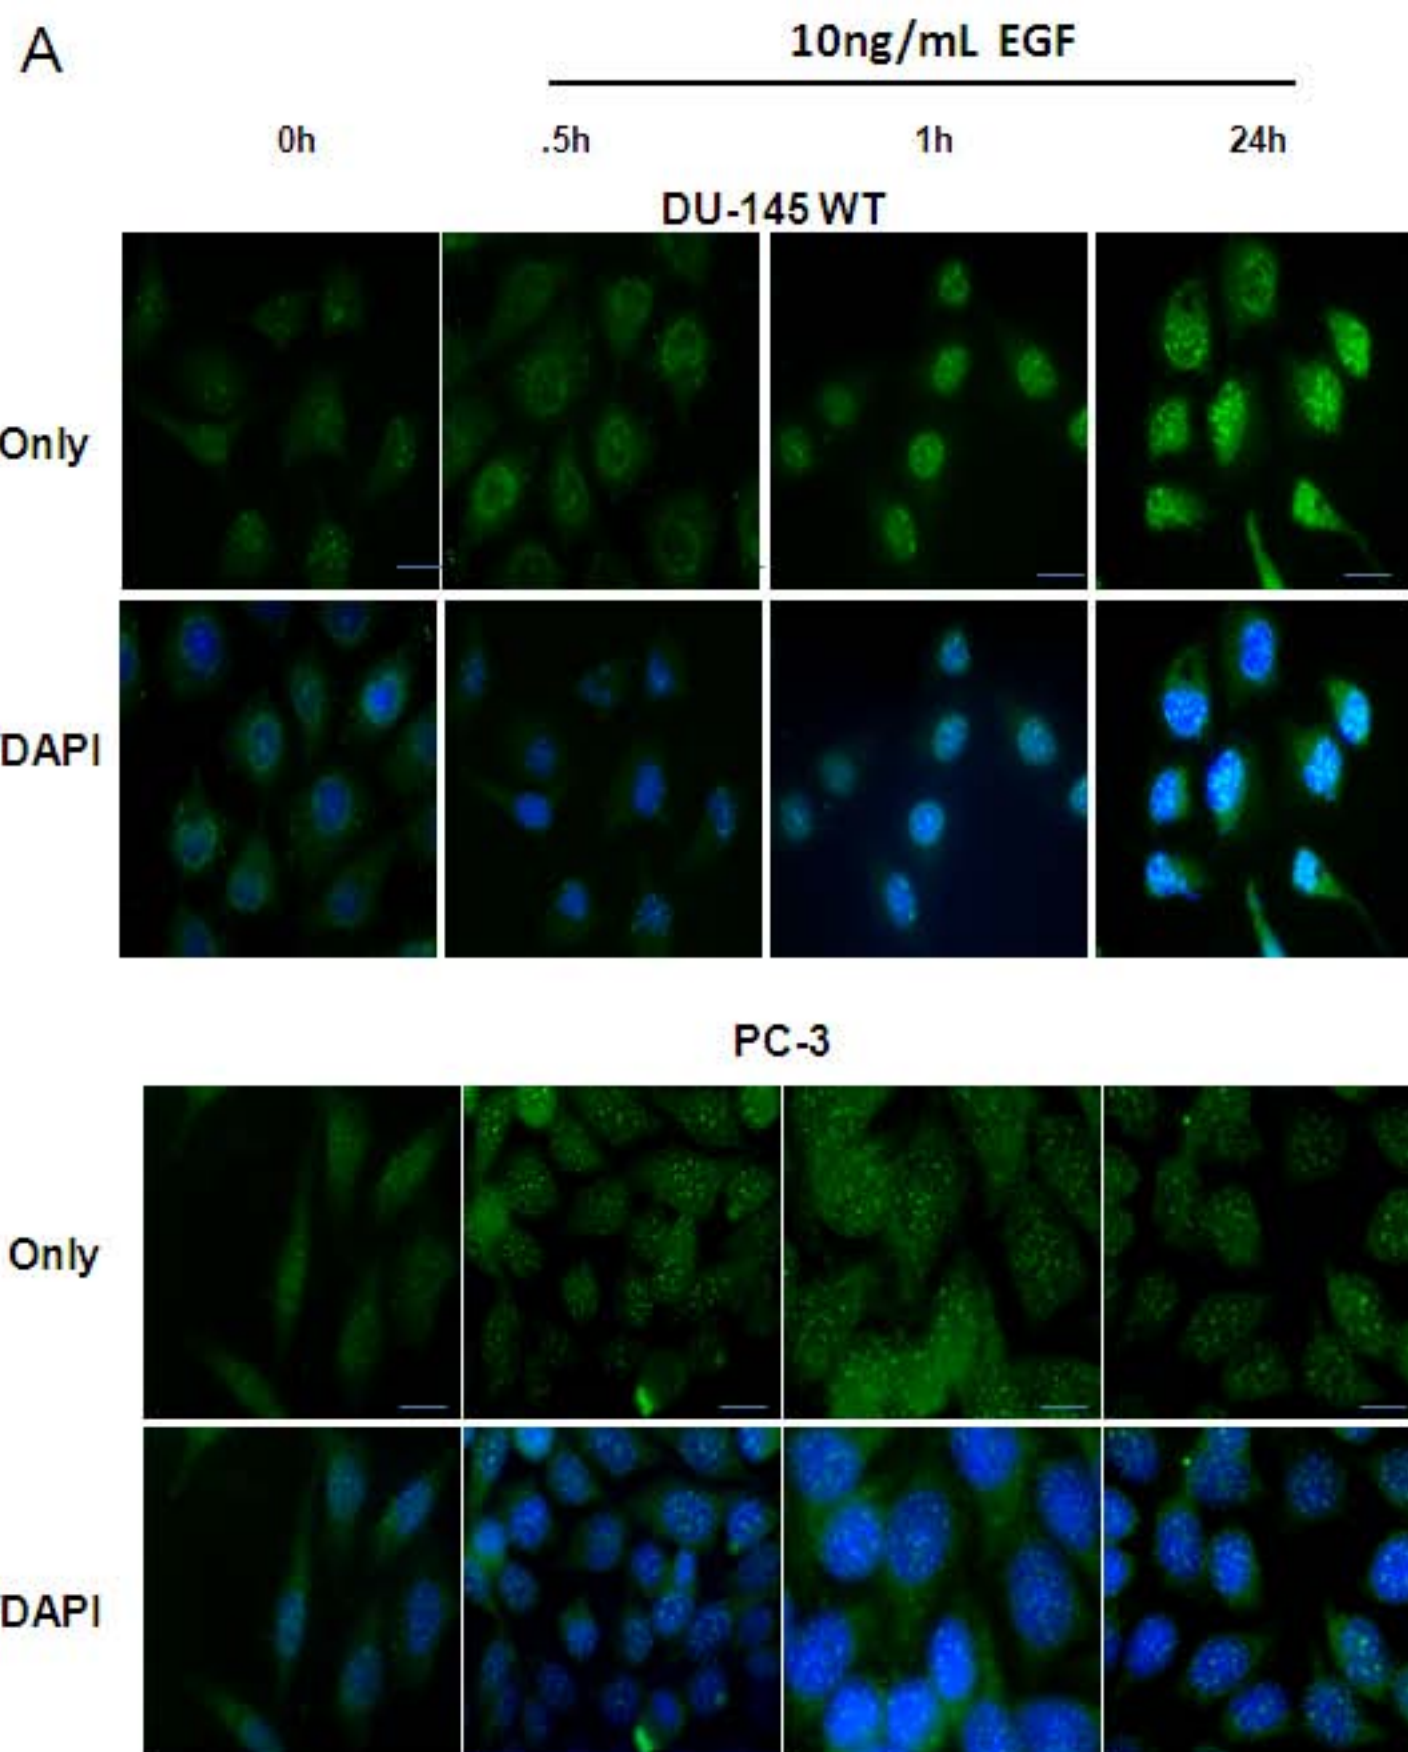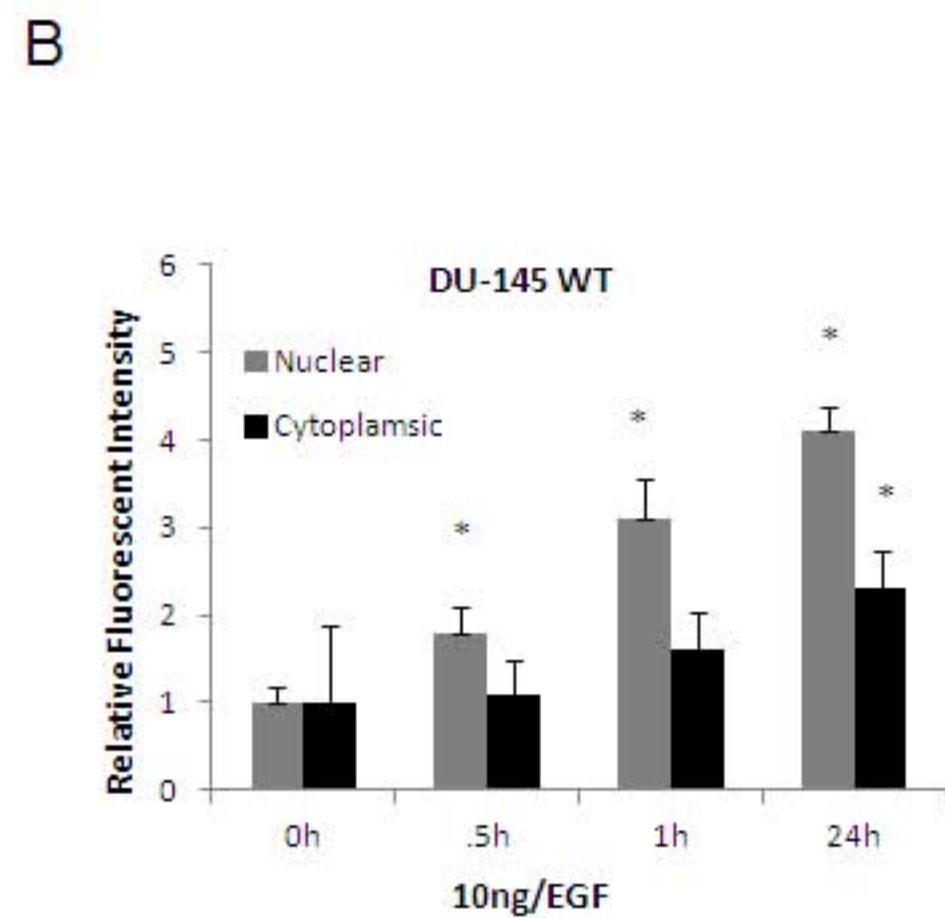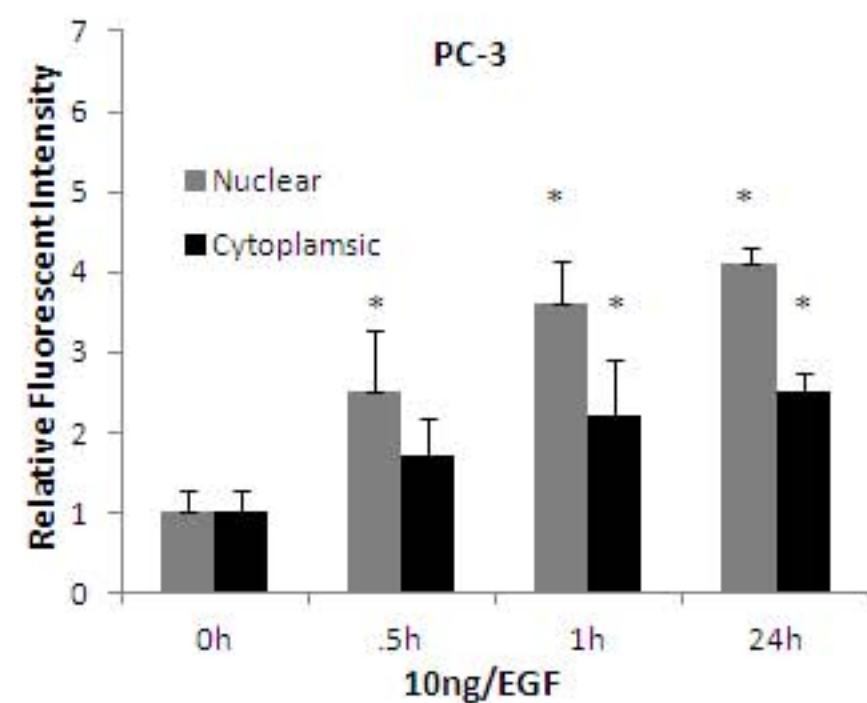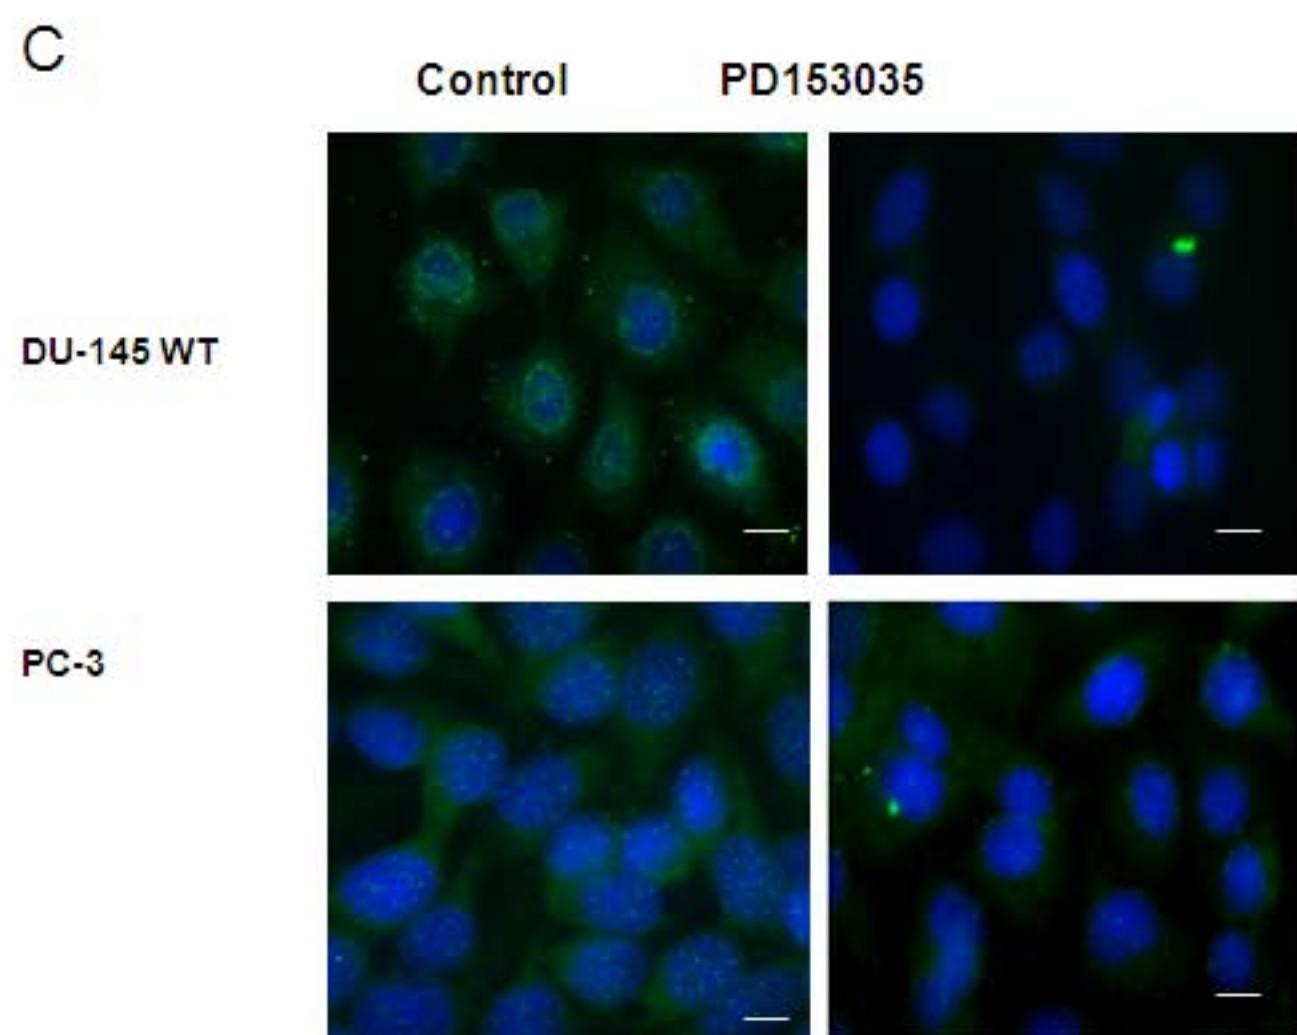

Supplement: mmc2.pdf [file mmc2.pdf]
